# Supplementary material for: Linkage Disequilibrium between Two High-Frequency Deletion Polymorphisms: Implications for Association Studies Involving the glutathione-S transferase (GST) Genes
Source: PLoS Genet. 2009 May 8;5(5):e1000472. doi: 10.1371/journal.pgen.1000472 (PMC2672168; doi:10.1371/journal.pgen.1000472)
Supplement: Table S6 — Linkage analysis between GSTT1 deletion and SNP (JCP). (0.16 MB XLS) [file pgen.1000472.s009.xls]

## Sheet: Sheet1
Table S6; LD - GSTT1 deletion and SNPs (JPT)
SNPs	Position	D	D'	r	P	r^2	plog
rs6003709	22104625	0.0150137	0.23098	0.104924	0.159218	0.0110091	0.798007
rs5996543	22109599	0.0171505	0.247189	0.116448	0.120279	0.01356	0.919811
rs5759802	22109822	0.0171744	0.0821384	0.0734212	0.362225	0.00539068	0.441022
rs5751660	22111075	0.00719026	0.0428049	0.0344356	0.645927	0.00118581	0.189817
rs8137947	22114222	-0.0150649	0.291365	-0.0890134	0.237644	0.00792339	0.624073
rs8140874	22114676	-0.0203191	0.50959	-0.134082	0.0919144	0.017978	1.03662
rs5759809	22116770	0.00480944	0.0262043	0.0201907	0.795969	0.000407664	0.0991037
rs2154589	22116995	0.0270976	0.372746	0.180257	0.0262589	0.0324927	1.58072
rs5751666	22117339	0.00907719	0.0528884	0.0431714	0.56463	0.00186377	0.248236
rs5759811	22118591	0.0118259	0.0719659	0.0570466	0.446599	0.00325432	0.350082
rs8139275	22119488	-0.0180372	0.327615	-0.103866	0.165823	0.0107882	0.780354
rs5751670	22123801	-0.00364318	0.025381	-0.0155294	0.835863	0.000241161	0.0778647
rs5759822	22130070	0.0215341	0.0966725	0.0951256	0.204393	0.00904889	0.689534
rs2000463	22133722	-0.0114794	0.188325	-0.0634611	0.397175	0.00402732	0.401018
rs17842461	22135130	0.0209697	0.29035	0.139894	0.0605353	0.0195703	1.21799
rs2000464	22137739	-0.0114794	0.188325	-0.0634611	0.397175	0.00402732	0.401018
rs11090253	22145383	0.015783	0.610505	0.169324	0.0246827	0.0286705	1.60761
rs12169718	22145573	-0.0200098	0.447424	-0.125664	0.0918039	0.0157914	1.03714
rs12169802	22145731	-0.0204305	0.435143	-0.125683	0.107501	0.0157962	0.968587
rs5759832	22145760	0.0469308	0.383413	0.251671	0.00178921	0.0633384	2.74734
rs4822416	22146428	-0.0195879	0.398473	-0.118195	0.114813	0.0139702	0.940008
rs7285434	22146569	0.00667806	0.223458	0.0668513	0.377869	0.00446909	0.422658
rs5759839	22147240	0.0296059	0.142298	0.126417	0.0898732	0.0159814	1.04637
rs5759841	22147414	0.0167899	0.0744379	0.0735378	0.323833	0.0054078	0.489679
rs7289380	22147486	0.0148787	0.447634	0.141615	0.0602809	0.0200548	1.21982
rs5759844	22147891	0.0296059	0.142298	0.126417	0.0898732	0.0159814	1.04637
rs5759845	22148166	0.0307928	0.147739	0.13154	0.079265	0.0173029	1.10092
rs2330498	22149697	0.032763	0.18516	0.154324	0.0384087	0.0238157	1.41557
rs5996555	22150990	0.0265549	0.128619	0.113192	0.130999	0.0128125	0.882733
rs5759847	22151430	0.0367623	0.21209	0.174292	0.0193679	0.0303777	1.71292
rs131303	22155928	-0.0209448	0.128442	-0.0880291	0.242872	0.00774912	0.614622
rs131305	22156549	-0.0190127	0.115035	-0.0798462	0.284058	0.00637541	0.546594
rs7290428	22156586	-0.00191389	0.962413	-0.053385	0.478801	0.00284996	0.319845
rs140154	22156675	0.0330576	0.146737	0.14564	0.0533438	0.0212109	1.27292
rs7290879	22156866	-0.00191389	0.962413	-0.053385	0.478801	0.00284996	0.319845
rs140152	22157304	0.0334562	0.150982	0.147977	0.0496303	0.0218972	1.30425
rs17002022	22157584	-0.00189238	0.962413	-0.0530826	0.478815	0.00281776	0.319832
rs9620278	22157836	-0.00194605	0.0329902	-0.0108991	0.884385	0.000118791	0.0533586
rs4822418	22159461	0.0178431	0.34902	0.138968	0.0637299	0.0193121	1.19566
rs131320	22164373	0.0340621	0.164981	0.145193	0.0527316	0.0210809	1.27793
rs131321	22164440	0.0340621	0.164981	0.145193	0.0527316	0.0210809	1.27793
rs2330510	22164462	0.00366002	0.979761	0.101513	0.180557	0.0103048	0.743386
rs9612360	22164813	-0.00189238	0.962413	-0.0530826	0.478815	0.00281776	0.319832
rs17543753	22164889	-0.00187136	0.962413	-0.0527852	0.478829	0.00278628	0.31982
rs140156	22165039	0.039262	0.205851	0.1653	0.0274273	0.0273242	1.56182
rs131329	22166045	0.039262	0.205851	0.1653	0.0274273	0.0273242	1.56182
rs140157	22166819	0.0375611	0.194513	0.158348	0.0367295	0.0250742	1.43499
rs140158	22166820	0.0234665	0.119027	0.0991961	0.212443	0.00983987	0.672757
rs131333	22168200	0.039262	0.205851	0.1653	0.0274273	0.0273242	1.56182
rs140159	22168745	0.0431712	0.224037	0.181955	0.0151996	0.0331078	1.81817
rs131338	22168833	0.0387435	0.19833	0.163566	0.0319407	0.0267539	1.49565
rs9612361	22169091	-0.00187136	0.962413	-0.0527852	0.478829	0.00278628	0.31982
rs9608151	22169286	-0.00193589	0.962413	-0.0536927	0.478786	0.00288291	0.319858
rs131341	22169467	0.039262	0.205851	0.1653	0.0274273	0.0273242	1.56182
rs131343	22169920	0.0329697	0.159414	0.14059	0.0621625	0.0197655	1.20647
rs13340083	22171406	0.0038832	0.979761	0.10458	0.18048	0.010937	0.74357
rs9608153	22172521	-0.00193589	0.962413	-0.0536927	0.478786	0.00288291	0.319858
rs131346	22172540	0.0543707	0.296405	0.228249	0.00327382	0.0520977	2.48495
rs131347	22173130	0.0430825	0.221318	0.181802	0.0152856	0.033052	1.81572
rs5996564	22173439	0.0188458	0.997376	0.235184	0.00203954	0.0553117	2.69047
rs131349	22173675	0.036112	0.18551	0.152388	0.042042	0.023222	1.37632
rs1612189	22174366	0.0603598	0.31391	0.254341	0.00120697	0.0646892	2.9183
rs12159208	22175271	0.0161724	0.995222	0.217175	0.00601296	0.0471651	2.22091
rs140161	22175547	0.0458355	0.22278	0.195231	0.0175448	0.0381151	1.75585
rs131351	22176120	0.036112	0.18551	0.152388	0.042042	0.023222	1.37632
rs140162	22176539	0.0121144	0.0581232	0.0517504	0.48992	0.0026781	0.309875
rs131352	22176777	-0.0382152	0.224119	-0.160294	0.0452766	0.0256943	1.34413
rs11912272	22176835	0.00447826	0.376633	0.0700629	0.369589	0.00490882	0.432281
rs5759855	22179044	-0.00701452	0.0557404	-0.0306468	0.682629	0.000939225	0.165816
rs5759858	22179802	-0.00491897	0.194597	-0.0398406	0.592983	0.00158727	0.226958
rs4822421	22182072	0.00946942	0.0457862	0.0426246	0.571747	0.00181686	0.242796
rs4822422	22182494	0.00573026	0.0253098	0.0252161	0.73655	0.000635854	0.132798
rs5996566	22183909	0.0106918	0.0498857	0.0460089	0.539324	0.00211682	0.26815
rs915580	22184125	0.0106918	0.0498857	0.0460089	0.539324	0.00211682	0.26815
rs738781	22184282	0.0106918	0.0498857	0.0460089	0.539324	0.00211682	0.26815
rs738782	22184533	0.00917137	0.0423109	0.0396009	0.599329	0.00156823	0.222335
rs915583	22184860	0.0106918	0.0498857	0.0460089	0.539324	0.00211682	0.26815
rs1811021	22184964	0.00980293	0.0458319	0.0421592	0.571649	0.0017774	0.242871
rs2330512	22185154	0.0106918	0.0498857	0.0460089	0.539324	0.00211682	0.26815
rs5759867	22185522	0.01042	0.0500608	0.0468236	0.532165	0.00219245	0.273954
rs5759868	22185657	-0.0164081	0.0958917	-0.0688186	0.355852	0.004736	0.448731
rs12157529	22185755	0.0048613	0.112184	0.0408591	0.583566	0.00166947	0.23391
rs12157976	22185943	0.0048613	0.112184	0.0408591	0.583566	0.00166947	0.23391
rs12167450	22186789	0.00415609	0.0948442	0.0347512	0.642906	0.00120765	0.191852
rs9624200	22188672	0.00415609	0.0948442	0.0347512	0.642906	0.00120765	0.191852
rs131356	22190188	0.0184108	0.187377	0.107758	0.157588	0.0116117	0.802476
rs131357	22190506	0.00944558	0.0783829	0.0509585	0.496586	0.00259677	0.304006
rs131359	22190874	0.0149253	0.0729861	0.0673872	0.368622	0.00454103	0.433418
rs1892707	22191112	0.00415609	0.0948442	0.0347512	0.642906	0.00120765	0.191852
rs1892709	22191265	0.00453743	0.102383	0.0377415	0.616584	0.00142442	0.210008
rs107261	22192788	0.0136533	0.11684	0.0745442	0.319958	0.00555684	0.494907
rs5751691	22196318	-0.024105	0.163116	-0.102321	0.16982	0.0104696	0.770011
rs4822423	22197924	-0.0208773	0.131082	-0.0878974	0.240917	0.00772595	0.618132
rs6003775	22199046	0.00973569	0.209692	0.079256	0.304291	0.00628152	0.516711
rs131381	22199059	0.0157017	0.106536	0.0786188	0.302505	0.00618091	0.519267
rs131382	22199130	0.010235	0.0622851	0.0493727	0.510079	0.00243766	0.292362
rs131384	22199391	0.0114926	0.0691861	0.0552419	0.458604	0.00305166	0.338562
rs2330514	22199784	-0.0206338	0.134325	-0.087174	0.242177	0.00759931	0.615867
rs2211894	22200528	-0.0129528	0.0798595	-0.054459	0.485543	0.00296578	0.313772
rs131385	22200698	0.0168563	0.0829848	0.0762447	0.311777	0.00581325	0.506156
rs2226386	22200769	-0.0609168	0.38966	-0.256898	0.00165323	0.0659967	2.78167
rs9612370	22201042	0.0300682	0.169888	0.126088	0.0943763	0.0158983	1.02514
rs131387	22201201	0.00851866	0.0651054	0.0445418	0.580435	0.00198397	0.236246
rs9612371	22201825	-0.00187136	0.962413	-0.0527852	0.478829	0.00278628	0.31982
rs6003782	22202134	-0.032838	0.213774	-0.138734	0.0626994	0.0192472	1.20274
rs131390	22202195	0.0119177	0.0533767	0.0519901	0.492841	0.00270297	0.307293
rs4820556	22202936	0.0205398	0.165434	0.109548	0.143864	0.0120008	0.842048
rs5759884	22203076	0.0202189	0.167784	0.10908	0.145583	0.0118985	0.836889
rs9624206	22203741	0.0212178	0.166181	0.111968	0.146704	0.0125369	0.833559
rs131391	22205858	-0.0328558	0.26402	-0.143905	0.053522	0.0207086	1.27147
rs131392	22207257	-0.0061465	0.0416791	-0.026098	0.727697	0.000681107	0.13805
rs4822424	22207733	-0.010839	0.16892	-0.0587295	0.430732	0.00344916	0.365793
rs7286533	22208658	0.0112903	0.995859	0.180816	0.0177216	0.0326946	1.7515
rs8137773	22208808	-0.0106356	0.165231	-0.0575572	0.447714	0.00331283	0.348999
rs131393	22209339	-0.0071172	0.0530475	-0.0306906	0.680517	0.00094191	0.167161
rs25271	22209817	0.0145345	0.0703982	0.0619544	0.408478	0.00383834	0.388831
rs6003783	22210999	-0.00463291	0.291212	-0.0466312	0.536159	0.00217447	0.270707
rs6003784	22211417	-0.00410038	0.407695	-0.0514582	0.497277	0.00264795	0.303402
rs9624207	22211587	-0.00536391	0.0802333	-0.0286082	0.702698	0.000818429	0.153231
rs11489069	22214559	0.00300442	0.130962	0.0341367	0.656256	0.00116531	0.182927
rs131406	22216870	-0.00392558	0.987003	-0.077649	0.302949	0.00602937	0.518631
rs7364197	22217749	-0.00806731	0.991127	-0.112223	0.141077	0.012594	0.850543
rs131408	22220836	0.0106096	0.0484233	0.0470556	0.530134	0.00221423	0.275614
rs131409	22221107	-0.0117511	0.0841731	-0.0503139	0.502048	0.00253149	0.299255
rs131411	22221904	-0.0123436	0.0881687	-0.0528258	0.47849	0.00279057	0.320127
rs179304	22224242	-0.0123436	0.0881687	-0.0528258	0.47849	0.00279057	0.320127
rs179305	22224580	-0.0148343	0.105064	-0.0633965	0.400321	0.00401911	0.397592
rs179306	22224697	-0.0117511	0.0841731	-0.0503139	0.502048	0.00253149	0.299255
rs179307	22225043	-0.0117511	0.0841731	-0.0503139	0.502048	0.00253149	0.299255
rs17002476	22225625	0.00500606	0.0311566	0.0243303	0.745479	0.000591962	0.127565
rs17002478	22225789	0.00288302	0.0177416	0.013959	0.851441	0.000194855	0.0698454
rs28376	22227780	0.00820328	0.040115	0.0370376	0.621205	0.00137179	0.206765
rs131414	22228323	0.0107143	0.0529827	0.0485221	0.515051	0.0023544	0.28815
rs12165365	22229570	0.0100717	0.0626841	0.0489502	0.513707	0.00239612	0.289285
rs9620289	22229964	0.00822502	0.0473145	0.0389592	0.609389	0.00151782	0.215105
rs131416	22233613	0.00390619	0.0187666	0.0175531	0.81484	0.00030811	0.0889278
rs8135486	22239857	0.0062333	0.426741	0.0881744	0.239438	0.00777473	0.620807
rs8142803	22239983	0.0124536	0.568395	0.144672	0.0535865	0.02093	1.27094
rs1807623	22240084	0.00912432	0.0624665	0.0458311	0.540893	0.00210049	0.266889
rs8138979	22240746	0.00407136	0.0230064	0.0170729	0.819817	0.000291483	0.0862831
rs107017	22242723	-0.0132124	0.124434	-0.0602562	0.421444	0.00363081	0.37526
rs4822427	22244948	-0.000916824	0.00548553	-0.00384826	0.959053	1.48091e-05	0.0181574
rs8141940	22245370	-0.00775951	0.789253	-0.0984591	0.188978	0.00969419	0.723588
rs131421	22251202	-0.0177569	0.258019	-0.0936689	0.21141	0.00877386	0.674875
rs5996577	22251427	0.0173128	0.0790173	0.0767856	0.305624	0.00589602	0.514812
rs2282474	22251581	0.0145315	0.0674473	0.0647202	0.387877	0.0041887	0.411306
rs9624216	22252552	0.0170507	0.16676	0.0981856	0.19021	0.00964042	0.720768
rs140174	22252983	0.00352048	0.0389961	0.0213426	0.774617	0.000455507	0.110913
rs131422	22253425	-5.42161e-05	0.000336915	-0.000228075	0.9976	5.20183e-08	0.00104373
rs9620291	22255069	0.0119907	0.11859	0.0693629	0.35206	0.00481121	0.453383
rs12627824	22255335	-0.011705	0.120394	-0.0547893	0.462293	0.00300187	0.335082
rs131428	22255431	0.0132303	0.0610631	0.0588419	0.437644	0.00346236	0.358879
rs131429	22255779	0.0222566	0.108837	0.0946796	0.206523	0.00896422	0.685031
rs13055172	22256250	0.00725271	0.993064	0.144264	0.0542638	0.0208122	1.26549
rs17627359	22256532	-0.0159092	0.311191	-0.094443	0.20766	0.00891947	0.682647
rs6003804	22256803	-0.000907391	0.0777764	-0.0105981	0.886932	0.000112319	0.0521099
rs6003805	22256905	-0.000827464	0.0701374	-0.00961255	0.897953	9.24011e-05	0.0467463
rs131430	22257134	0.01042	0.0500608	0.0468236	0.532165	0.00219245	0.273954
rs9612384	22259701	0.00847147	0.257764	0.0810632	0.279467	0.00657124	0.553669
rs7287616	22259852	0.00725271	0.993064	0.144264	0.0542638	0.0208122	1.26549
rs11090262	22260279	0.00874077	0.268947	0.0840837	0.259277	0.00707008	0.586236
rs131432	22260914	0.0170269	0.0785858	0.0757272	0.309636	0.00573461	0.509149
rs140176	22261022	0.0212519	0.104091	0.0903761	0.225313	0.00816783	0.647215
rs9608164	22261845	0.0168306	0.310719	0.127671	0.0867325	0.0163	1.06182
rs9612385	22262181	0.0190995	0.326895	0.140002	0.0617819	0.0196005	1.20914
rs131433	22263452	0.0292777	0.131436	0.129333	0.0844352	0.0167269	1.07348
rs17002697	22264025	-0.00130208	0.223214	-0.0213242	0.774806	0.000454723	0.110807
rs12170095	22264238	-0.00772158	0.0727218	-0.035215	0.638479	0.0012401	0.194854
rs867108	22267135	-0.0475544	0.349379	-0.204516	0.00607201	0.0418267	2.21667
rs7290863	22267621	0.0149007	0.340041	0.124592	0.0964593	0.0155232	1.01566
rs3747125	22267732	-0.00264913	0.0391804	-0.0140683	0.851945	0.000197917	0.0695883
rs7292276	22267811	0.0180771	0.113772	0.0881893	0.236736	0.00777735	0.625735
rs7288250	22268204	0.0224201	0.104932	0.0963924	0.206168	0.00929149	0.68578
rs7293024	22268238	0.0252745	0.118167	0.108698	0.14475	0.0118151	0.839383
rs4358231	22268351	-0.00189238	0.962413	-0.0530826	0.478815	0.00281776	0.319832
rs5759913	22269293	0.00683253	0.0496911	0.0350757	0.661318	0.0012303	0.17959
rs5759919	22269595	0.0278065	0.205803	0.14367	0.0552638	0.0206411	1.25756
rs4820559	22270991	0.0337306	0.19874	0.161002	0.0307675	0.0259216	1.51191
rs9624223	22274762	-0.00451295	0.0783566	-0.0255184	0.748392	0.000651187	0.125871
rs11090264	22275369	0.0261732	0.133109	0.110596	0.140069	0.0122315	0.853658
rs11090265	22276990	-0.00380003	0.0223176	-0.0159399	0.846241	0.000254079	0.0725059
rs2154592	22277352	0.0153679	0.0788559	0.0648601	0.389532	0.00420683	0.409457
rs9612389	22279555	0.0191319	0.170905	0.106234	0.154075	0.0112857	0.812267
rs2298372	22280646	0.0102946	0.256286	0.0896366	0.231735	0.00803472	0.635008
rs17545261	22281753	0.00357778	0.979761	0.100359	0.180585	0.0100719	0.743318
rs9624230	22282627	-0.0252228	0.168152	-0.106859	0.184812	0.0114188	0.73327
rs17627963	22285765	-0.0258694	0.475152	-0.149647	0.0446729	0.0223941	1.34996
rs6003815	22290187	0.0360827	0.214807	0.172808	0.0211364	0.0298624	1.67497
rs12484556	22292404	-0.019894	0.165861	-0.0878805	0.241008	0.00772299	0.617969
rs13055561	22295020	-0.0128553	0.108382	-0.056941	0.444901	0.00324228	0.351737
rs9680742	22296720	-0.00241512	0.033735	-0.012553	0.867737	0.000157577	0.0616119
rs12167140	22301028	0.0155312	0.0769922	0.0703843	0.353183	0.00495395	0.452
rs17002904	22301739	-0.000816304	0.0182528	-0.00512649	0.945165	2.62809e-05	0.0244921
rs12170399	22302141	-0.00763018	0.0654016	-0.0339352	0.648902	0.0011516	0.187821
rs8137495	22302409	-0.00389928	0.033051	-0.0172941	0.817523	0.000299085	0.0874998
rs17002910	22303725	-0.0146853	0.243628	-0.081544	0.273943	0.00664943	0.56234
rs3747102	22303849	-0.00594165	0.0512162	-0.0264629	0.724044	0.000700285	0.140235
rs3747103	22303861	-0.0064944	0.0563061	-0.0289672	0.700762	0.000839096	0.15443
rs3827318	22304200	-0.0174689	0.283366	-0.096144	0.202134	0.00924367	0.69436
rs3788361	22304361	-0.00594165	0.0512162	-0.0264629	0.724044	0.000700285	0.140235
rs7289104	22307513	0.0063915	0.353991	0.0815418	0.273956	0.00664907	0.56232
rs9306387	22309219	-0.00654725	0.0635312	-0.0301162	0.686175	0.000906988	0.163565
rs10427870	22309342	-0.00910876	0.0663827	-0.0391169	0.603799	0.00153013	0.219107
rs2006091	22309780	-0.0241938	0.18571	-0.104932	0.159185	0.0110108	0.798097
rs16994633	22310868	-0.0326619	0.258424	-0.142567	0.0557823	0.0203253	1.2535
rs17003000	22312186	0.00816563	0.992438	0.153137	0.0542424	0.0234508	1.26566
rs12627958	22312775	-0.0123445	0.101479	-0.0543498	0.486418	0.00295391	0.312991
rs2330575	22312999	0.00612952	0.335709	0.0777763	0.299426	0.00604916	0.523711
rs11703537	22313422	0.0223714	0.120813	0.103915	0.172933	0.0107984	0.762121
rs7291114	22313495	0.01801	0.997476	0.229769	0.0020515	0.0527937	2.68793
rs6003823	22321420	-0.00271995	0.0186931	-0.0115707	0.877317	0.00013388	0.0568437
rs6003824	22323051	-0.000801871	0.00599719	-0.00346006	0.96318	1.1972e-05	0.0162924
rs6003826	22323358	-0.0266945	0.213072	-0.116744	0.121434	0.0136291	0.915659
rs6003827	22323416	-0.0283927	0.224646	-0.123932	0.0963679	0.0153591	1.01607
rs8139016	22323831	-0.0275691	0.219076	-0.120451	0.108052	0.0145083	0.966368
rs6003828	22324026	0.0274321	0.759659	0.251083	0.000755433	0.0630425	3.1218
rs9624263	22324781	0.00734439	0.0366103	0.0311312	0.690133	0.000969153	0.161067
rs17003098	22324933	-0.0283927	0.224646	-0.123932	0.0963679	0.0153591	1.01607
rs6519457	22325056	-0.0275691	0.219076	-0.120451	0.108052	0.0145083	0.966368
rs3747106	22325213	-0.026864	0.211074	-0.117083	0.120356	0.0137084	0.919532
rs3747107	22325540	-0.0275691	0.219076	-0.120451	0.108052	0.0145083	0.966368
rs8136455	22325561	-0.0283927	0.224646	-0.123932	0.0963679	0.0153591	1.01607
rs6003829	22326225	-0.0418895	0.341955	-0.18413	0.019855	0.0339037	1.70213
rs6003830	22326259	-0.0275691	0.219076	-0.120451	0.108052	0.0145083	0.966368
rs6519460	22326463	-0.0266945	0.213072	-0.116744	0.121434	0.0136291	0.915659
rs6003832	22326567	-0.0145976	0.144372	-0.0675239	0.364974	0.00455948	0.437738
rs8137658	22327651	-0.0372892	0.298313	-0.16316	0.0344474	0.0266212	1.46284
rs6003833	22327997	-0.0390252	0.332316	-0.173282	0.0326502	0.0300265	1.48611
rs3827319	22328208	-0.00456258	0.0339725	-0.0196709	0.796422	0.000386943	0.098857
rs2226387	22328404	0.015221	0.995222	0.210532	0.006051	0.0443238	2.21817
rs17003135	22328833	0.0145369	0.995222	0.205635	0.00607844	0.042286	2.21621
rs7288276	22329627	-0.0127271	0.115583	-0.0574624	0.443293	0.00330193	0.353309
rs12166768	22330993	0.0147021	0.995222	0.206828	0.00607181	0.0427777	2.21668
rs6519465	22331094	-0.00482556	0.0395236	-0.0212276	0.780707	0.00045061	0.107512
rs7288934	22331281	-0.020474	0.182675	-0.092003	0.219645	0.00846455	0.658279
rs5751704	22331975	0.0104308	0.0470564	0.0453812	0.542622	0.00205946	0.265503
rs5751705	22332030	-0.0216726	0.192171	-0.0972297	0.192072	0.00945361	0.716535
rs10222270	22334787	0.0145369	0.995222	0.205635	0.00607844	0.042286	2.21621
rs5759950	22342624	0.00024384	0.00108091	0.00107393	0.988828	1.15332e-06	0.0048792
rs762262	22343178	-0.00353773	0.0295747	-0.0156378	0.844168	0.000244542	0.0735711
rs2330555	22343288	0.0075076	0.0340907	0.0325874	0.663729	0.00106194	0.178009
rs12157657	22344229	0.0145369	0.995222	0.205635	0.00607844	0.042286	2.21621
rs16990485	22344930	0.01801	0.997476	0.229769	0.0020515	0.0527937	2.68793
rs1109403	22346138	-0.00275832	0.236427	-0.0322163	0.665576	0.00103789	0.176802
rs1811024	22346474	-0.020474	0.182675	-0.092003	0.219645	0.00846455	0.658279
rs12169702	22348850	0.0143754	0.995222	0.204464	0.00608493	0.0418054	2.21574
rs17003259	22349769	0.0182119	0.997451	0.231087	0.00204863	0.0534014	2.68854
rs5759958	22350846	-0.0106119	0.0965282	-0.0479333	0.549381	0.00229761	0.260126
rs762263	22351462	0.0147021	0.995222	0.206828	0.00607181	0.0427777	2.21668
rs9624283	22351525	-0.01059	0.0847201	-0.0463369	0.54811	0.00214711	0.261133
rs9624285	22351950	-0.0473883	0.55479	-0.231311	0.00271639	0.0535048	2.56601
rs5751708	22352307	-0.0114398	0.0953766	-0.0505348	0.500172	0.00255377	0.300881
rs738785	22352631	-0.0114398	0.0953766	-0.0505348	0.500172	0.00255377	0.300881
rs2330578	22352975	-0.00885726	0.0746748	-0.0392322	0.598641	0.00153917	0.222833
rs5759960	22354308	-0.0240829	0.220186	-0.108932	0.148416	0.0118662	0.828518
rs2330579	22354430	-0.020474	0.182675	-0.092003	0.219645	0.00846455	0.658279
rs3747110	22354815	0.0305561	0.141573	0.131763	0.0770966	0.0173615	1.11296
rs2051193	22354847	-0.020474	0.182675	-0.092003	0.219645	0.00846455	0.658279
rs3747112	22354933	-0.0172228	0.178756	-0.0808428	0.280776	0.00653555	0.551639
rs2051194	22355007	0.0145369	0.995222	0.205635	0.00607844	0.042286	2.21621
rs5759961	22355365	-0.0449572	0.526328	-0.219444	0.00445064	0.0481557	2.35158
rs5759963	22356415	-0.0246705	0.226091	-0.111662	0.145421	0.0124684	0.837373
rs1000470	22356845	-0.0407371	0.470857	-0.197989	0.00825401	0.0391995	2.08333
rs1539766	22357192	-0.00574002	0.0395399	-0.0244262	0.7459	0.000596637	0.127319
rs1539767	22357233	-0.0124263	0.105328	-0.0551131	0.462157	0.00303745	0.335211
rs9624291	22358351	0.0110346	0.995943	0.178729	0.017735	0.031944	1.75117
rs17003315	22358370	0.0186296	0.997401	0.233794	0.00204265	0.0546598	2.68981
rs11090280	22358412	0.00831386	0.03718	0.0362893	0.626349	0.00131692	0.203184
rs5751710	22358627	-0.0176403	0.15916	-0.0795055	0.286117	0.00632112	0.543456
rs8140340	22359646	-0.00625788	0.0378323	-0.0262796	0.750835	0.000690618	0.124455
rs6003842	22360367	-0.0278395	0.270441	-0.128099	0.0948793	0.0164093	1.02283
rs2070445	22360907	0.000775003	0.00342309	0.00341042	0.963708	1.1631e-05	0.0160544
rs11703116	22361712	0.0216835	0.0978203	0.094338	0.205628	0.00889966	0.686917
rs7287369	22362015	0.0145369	0.995222	0.205635	0.00607844	0.042286	2.21621
rs13057362	22362771	0.0063915	0.353991	0.0815418	0.273956	0.00664907	0.56232
rs5751713	22363466	-0.0365638	0.395645	-0.173899	0.0203357	0.0302407	1.69174
rs5751714	22363486	-0.0392692	0.416067	-0.185519	0.0133185	0.0344174	1.87555
rs17629631	22363869	0.0143754	0.995222	0.204464	0.00608493	0.0418054	2.21574
rs738786	22364288	0.00842341	0.0382492	0.0365625	0.625688	0.00133682	0.203642
rs17003397	22365129	0.0107903	0.996026	0.176712	0.0177473	0.0312273	1.75087
rs2070446	22365970	-0.0196735	0.172506	-0.0880047	0.240343	0.00774483	0.619168
rs2070447	22366563	-0.0353963	0.383012	-0.168346	0.0247031	0.0283403	1.60725
rs2070448	22366657	-0.0353963	0.383012	-0.168346	0.0247031	0.0283403	1.60725
rs12170464	22367306	0.0143754	0.995222	0.204464	0.00608493	0.0418054	2.21574
rs1007298	22368847	-0.0236536	0.239352	-0.110168	0.150884	0.012137	0.821356
rs2186363	22370735	0.01801	0.997476	0.229769	0.0020515	0.0527937	2.68793
rs9624295	22374488	0.0191417	0.0856027	0.083552	0.262302	0.00698094	0.581199
rs8140076	22374515	-0.0227828	0.197525	-0.101619	0.177618	0.0103264	0.750512
rs7291110	22375321	0.0145369	0.995222	0.205635	0.00607844	0.042286	2.21621
rs7286137	22375645	0.0143754	0.995222	0.204464	0.00608493	0.0418054	2.21574
rs6003847	22377657	0.0324447	0.998299	0.312109	2.82187e-05	0.0974122	4.54946
rs5759967	22378368	-0.0354442	0.355476	-0.164639	0.0308331	0.027106	1.51098
rs6003849	22379993	0.0488642	0.236676	0.208288	0.00545422	0.0433838	2.26327
rs17629956	22380471	0.0150441	0.995222	0.209275	0.0060581	0.0437962	2.21766
rs9608174	22382031	0.0204685	0.0913131	0.0894279	0.232824	0.00799734	0.632973
rs8184966	22386274	0.00463831	0.214076	0.054174	0.467336	0.00293483	0.330371
rs915588	22386339	-0.0192263	0.163866	-0.0853885	0.257296	0.00729119	0.589567
rs2070444	22386537	0.0243915	0.107868	0.106942	0.153641	0.0114367	0.813493
rs8143019	22387485	0.0143754	0.995222	0.204464	0.00608493	0.0418054	2.21574
rs9612404	22388900	0.0204685	0.0913131	0.0894279	0.232824	0.00799734	0.632973
rs9608176	22389933	0.0392598	0.194582	0.166581	0.0298589	0.0277494	1.52493
rs2330580	22391698	0.0145369	0.995222	0.205635	0.00607844	0.042286	2.21621
rs738787	22400416	-0.016917	0.136563	-0.0741707	0.322389	0.00550129	0.49162
rs2330582	22402455	-0.026356	0.273549	-0.123713	0.0988328	0.0153049	1.0051
rs11703662	22404919	0.00357778	0.979761	0.100359	0.180585	0.0100719	0.743318
rs140179	22405670	0.032157	0.144362	0.142052	0.0580651	0.0201787	1.23608
rs2070450	22408513	-0.0294095	0.257877	-0.131557	0.0792277	0.0173072	1.10112
rs736860	22409243	-0.022701	0.240522	-0.107246	0.152476	0.0115017	0.8168
rs5759980	22410163	-0.0152405	0.168239	-0.0729536	0.341504	0.00532222	0.466604
rs5759982	22411194	-0.0232489	0.256433	-0.111258	0.151726	0.0123784	0.818941
rs2067621	22415854	-0.0294095	0.257877	-0.131557	0.0792277	0.0173072	1.10112
rs5759985	22416107	0.0341782	0.152474	0.149326	0.0463423	0.0222984	1.33402
rs2070451	22417319	-0.022701	0.240522	-0.107246	0.152476	0.0115017	0.8168
rs6003869	22418160	0.0122871	0.995567	0.18875	0.0176655	0.0356267	1.75287
rs5759986	22418324	0.050213	0.232154	0.216668	0.00384373	0.0469449	2.41525
rs6003870	22422597	0.00796197	0.0778699	0.0458485	0.540739	0.00210209	0.267012
rs2070452	22424836	0.00036849	0.00183472	0.00167194	0.982204	2.7954e-06	0.00779852
rs2070454	22426674	-0.0426834	0.301494	-0.182335	0.0149889	0.0332459	1.82423
rs1076123	22426783	-0.00347656	0.0315728	-0.0156966	0.834121	0.000246383	0.0787707
rs9612418	22427015	-0.0565308	0.442868	-0.246227	0.00132546	0.0606278	2.87763
rs5759997	22429143	0.020959	0.212575	0.122498	0.10219	0.0150058	0.990591
rs6003875	22431860	0.00698087	0.112452	0.0497968	0.506452	0.00247972	0.295461
rs9612422	22432408	0.00302161	0.0878073	0.0282919	0.712217	0.00080043	0.147388
rs2330621	22435274	0.00469834	0.0989709	0.0378582	0.613495	0.00143324	0.212189
rs2298375	22436448	-0.00104511	0.0408856	-0.00842127	0.910543	7.09178e-05	0.0406996
rs140182	22438288	-0.0416547	0.311535	-0.179739	0.0164842	0.0323061	1.78293
rs9153	22438412	-0.038696	0.293727	-0.167455	0.025475	0.028041	1.59389
rs131442	22438977	-0.032827	0.252953	-0.142488	0.0572978	0.0203029	1.24186
rs131444	22439550	-0.029881	0.281419	-0.136275	0.0690434	0.0185709	1.16088
rs131445	22441044	-0.0336101	0.208453	-0.14137	0.0592805	0.0199854	1.22709
rs131451	22443544	-0.0526271	0.372731	-0.224909	0.0028473	0.0505842	2.54557
rs738789	22446586	-0.0420577	0.388898	-0.190828	0.0108978	0.0364152	1.96266
rs738790	22446817	-0.0420577	0.388898	-0.190828	0.0108978	0.0364152	1.96266
rs738791	22447525	0.018232	0.0875925	0.0819283	0.274367	0.00671225	0.561668
rs2267029	22447916	-0.0420577	0.388898	-0.190828	0.0108978	0.0364152	1.96266
rs7289910	22448638	-0.00385877	0.98123	-0.0767551	0.305816	0.00589134	0.514539
rs738792	22451378	-0.0454228	0.405276	-0.204114	0.00646481	0.0416626	2.18944
rs7289794	22452267	-0.0391483	0.367214	-0.178337	0.0186514	0.031804	1.72929
rs2070455	22454842	-0.0420577	0.388898	-0.190828	0.0108978	0.0364152	1.96266
rs2877173	22455565	-0.0449653	0.408358	-0.203017	0.00675707	0.0412159	2.17024
rs6003877	22456853	0.00370258	0.979761	0.102104	0.180542	0.0104253	0.743421
rs2073387	22459005	-0.0385714	0.350291	-0.174149	0.0201559	0.0303278	1.6956
rs2267030	22462374	0.00674686	0.167964	0.0587458	0.433177	0.00345106	0.363334
rs5760020	22463092	-0.0427372	0.289799	-0.181462	0.0154775	0.0329286	1.8103
rs2073388	22463368	-0.0420577	0.388898	-0.190828	0.0108978	0.0364152	1.96266
rs2073389	22463493	-0.0427372	0.289799	-0.181462	0.0154775	0.0329286	1.8103
rs2073390	22463570	-0.0332141	0.340856	-0.155362	0.0392929	0.0241373	1.40569
rs5760022	22464394	-0.0399531	0.373588	-0.181843	0.0147004	0.0330668	1.83267
rs738794	22464758	-0.0454228	0.405276	-0.204114	0.00646481	0.0416626	2.18944
rs17630758	22466542	0.0143754	0.995222	0.204464	0.00608493	0.0418054	2.21574
rs5760023	22468301	-0.0427372	0.289799	-0.181462	0.0154775	0.0329286	1.8103
rs2267031	22468344	-0.050453	0.469827	-0.229368	0.00234304	0.0526096	2.63022
rs2186364	22468841	-0.0483761	0.455606	-0.220624	0.00324536	0.0486749	2.48874
rs3788362	22470348	-0.0483761	0.455606	-0.220624	0.00324536	0.0486749	2.48874
rs12167679	22471690	0.0117587	0.171382	0.0802329	0.281732	0.00643732	0.550164
rs738796	22472523	-0.0540913	0.485717	-0.243481	0.00123732	0.0592828	2.90752
rs9608184	22472738	-0.0518908	0.471253	-0.234286	0.00177346	0.0548898	2.75118
rs17548631	22474125	0.01801	0.997476	0.229769	0.0020515	0.0527937	2.68793
rs17003912	22475809	0.00961918	0.221981	0.080849	0.278054	0.00653655	0.555872
rs17003930	22476055	0.00961918	0.221981	0.080849	0.278054	0.00653655	0.555872
rs5760033	22476560	-0.0359104	0.320403	-0.161369	0.0313245	0.0260398	1.50412
rs9620326	22476629	0.0143754	0.995222	0.204464	0.00608493	0.0418054	2.21574
rs5751739	22477056	-0.0339713	0.506103	-0.180907	0.0288227	0.0327272	1.54027
rs11912715	22477595	0.00961918	0.221981	0.080849	0.278054	0.00653655	0.555872
rs2267032	22478273	-0.0380581	0.294428	-0.16533	0.0282822	0.027334	1.54849
rs2267033	22478533	0.0110453	0.30247	0.100566	0.179688	0.0101135	0.745482
rs2267034	22478689	-0.050453	0.469827	-0.229368	0.00234304	0.0526096	2.63022
rs2267035	22478787	0.0110453	0.30247	0.100566	0.179688	0.0101135	0.745482
rs2267036	22479191	0.00915826	0.208996	0.0765769	0.30694	0.00586402	0.512946
rs11703080	22479487	0.00961918	0.221981	0.080849	0.278054	0.00653655	0.555872
rs5751741	22480853	-0.0483761	0.455606	-0.220624	0.00324536	0.0486749	2.48874
rs5760044	22485555	-0.0483761	0.455606	-0.220624	0.00324536	0.0486749	2.48874
rs5760045	22485614	-0.0460351	0.483167	-0.216839	0.00362356	0.0470191	2.44086
rs4607038	22487410	-0.0483761	0.455606	-0.220624	0.00324536	0.0486749	2.48874
rs738798	22488149	-0.0539864	0.490285	-0.243747	0.00114599	0.0594127	2.94082
rs738799	22488265	0.041027	0.202574	0.174201	0.0201186	0.0303459	1.6964
rs738800	22488315	-0.0463261	0.273955	-0.194362	0.00951103	0.0377767	2.02177
rs9612450	22488370	0.0133646	0.436919	0.132316	0.0844941	0.0175074	1.07317
rs2073391	22488573	0.032157	0.144362	0.142052	0.0580651	0.0201787	1.23608
rs2070456	22488697	0.032157	0.144362	0.142052	0.0580651	0.0201787	1.23608
rs2070457	22488899	0.0166027	0.0874341	0.0765455	0.307139	0.00585922	0.512666
rs9612452	22489244	0.00961918	0.221981	0.080849	0.278054	0.00653655	0.555872
rs928782	22489437	-0.0477839	0.45852	-0.219088	0.00346679	0.0479995	2.46007
rs9612453	22489452	0.00961918	0.221981	0.080849	0.278054	0.00653655	0.555872
rs2073395	22489620	0.00915826	0.208996	0.0765769	0.30694	0.00586402	0.512946
rs9608193	22491136	0.0121903	0.248135	0.0966904	0.204768	0.00934903	0.688737
rs9608194	22491209	0.0131123	0.605184	0.153148	0.0607004	0.0234543	1.21681
rs9612458	22491854	0.00874687	0.207968	0.0745446	0.331079	0.0055569	0.480068
rs9612459	22491912	0.0138756	0.345436	0.120817	0.106984	0.0145967	0.970681
rs9612460	22491998	0.00961918	0.221981	0.080849	0.278054	0.00653655	0.555872
rs9608195	22493001	0.0138756	0.345436	0.120817	0.106984	0.0145967	0.970681
rs9608196	22493081	0.00915826	0.208996	0.0765769	0.30694	0.00586402	0.512946
rs2051195	22495088	-0.0264301	0.746754	-0.183794	0.0142018	0.0337802	1.84766
rs11703421	22495498	0.0127632	0.329879	0.113096	0.142677	0.0127908	0.845646
rs9612473	22495632	0.00951768	0.214758	0.0791664	0.293598	0.00626731	0.532246
rs9612475	22495947	0.0138756	0.345436	0.120817	0.106984	0.0145967	0.970681
rs9608199	22496230	0.00380041	0.0935486	0.0329166	0.662338	0.0010835	0.17892
rs9624334	22496256	0.0143754	0.995222	0.204464	0.00608493	0.0418054	2.21574
rs5996618	22496401	0.00393114	0.979761	0.105228	0.180464	0.0110728	0.74361
rs9608201	22496788	-0.0457915	0.327082	-0.195969	0.0163894	0.038404	1.78544
rs11704097	22497098	0.00961918	0.221981	0.080849	0.278054	0.00653655	0.555872
rs11704313	22497185	0.00961918	0.221981	0.080849	0.278054	0.00653655	0.555872
rs2229354	22497513	0.0110453	0.30247	0.100566	0.179688	0.0101135	0.745482
rs9612476	22497906	0.0116712	0.319613	0.106265	0.156262	0.0112923	0.806147
rs5751745	22498209	-0.0503828	0.492755	-0.232287	0.00194115	0.0539572	2.71194
rs8140489	22498335	0.00915826	0.208996	0.0765769	0.30694	0.00586402	0.512946
rs9608202	22498365	0.0113504	0.314319	0.103889	0.163373	0.0107929	0.786819
rs879452	22498665	0.00915826	0.208996	0.0765769	0.30694	0.00586402	0.512946
rs2267038	22499196	-0.0383728	0.300236	-0.167093	0.0257944	0.0279199	1.58847
rs11705032	22499707	0.00961918	0.221981	0.080849	0.278054	0.00653655	0.555872
rs2186369	22500996	0.0147021	0.995222	0.206828	0.00607181	0.0427777	2.21668
rs1573277	22501028	-0.0477839	0.45852	-0.219088	0.00346679	0.0479995	2.46007
rs9612478	22501052	0.0133464	0.353166	0.119576	0.116828	0.0142984	0.932452
rs2186370	22501305	-0.0360476	0.285212	-0.157345	0.0347722	0.0247574	1.45877
rs11912883	22501536	0.0113504	0.314319	0.103889	0.163373	0.0107929	0.786819
rs9608205	22502594	0.0113504	0.314319	0.103889	0.163373	0.0107929	0.786819
rs6003904	22503394	0.0113504	0.314319	0.103889	0.163373	0.0107929	0.786819
rs8138827	22504145	0.00866894	0.195607	0.0721066	0.338768	0.00519937	0.470098
rs5760060	22504303	0.0343453	0.155918	0.152129	0.0412487	0.0231431	1.38459
rs9612480	22504335	0.000711442	0.0465173	0.00984042	0.897909	9.68339e-05	0.0467677
rs9612481	22504510	0.0120404	0.318609	0.107876	0.157135	0.0116371	0.803728
rs17003993	22505101	0.00225743	0.0124743	0.0105593	0.888593	0.000111499	0.0512973
rs2267044	22505208	0.032157	0.144362	0.142052	0.0580651	0.0201787	1.23608
rs2267045	22505583	0.00915826	0.208996	0.0765769	0.30694	0.00586402	0.512946
rs2267046	22505620	0.0110453	0.30247	0.100566	0.179688	0.0101135	0.745482
rs17003998	22506053	0.00961918	0.221981	0.080849	0.278054	0.00653655	0.555872
rs9612483	22506164	0.00961918	0.221981	0.080849	0.278054	0.00653655	0.555872
rs5030613	22506287	0.0118625	0.249885	0.0955856	0.202213	0.00913661	0.694191
rs9612484	22507511	0.00714346	0.179836	0.0625246	0.40155	0.00390933	0.39626
rs5760061	22508279	-0.0383728	0.300236	-0.167093	0.0257944	0.0279199	1.58847
rs5760062	22508590	-0.0453919	0.443943	-0.209277	0.00523675	0.0437967	2.28094
rs1128127	22509132	0.00961918	0.221981	0.080849	0.278054	0.00653655	0.555872
rs9612485	22509502	0.00915826	0.208996	0.0765769	0.30694	0.00586402	0.512946
rs5760063	22509819	0.0075043	0.992876	0.14676	0.0542616	0.0215386	1.26551
rs6003907	22510449	0.0052489	0.111811	0.0425128	0.568427	0.00180734	0.245325
rs6003909	22511652	-0.0330943	0.258935	-0.144107	0.0545262	0.0207669	1.26339
rs2275977	22511703	-0.00183032	0.0282075	-0.00987449	0.895188	9.75056e-05	0.0480856
rs2275978	22511883	0.0326672	0.23277	0.166457	0.0272231	0.027708	1.56506
rs6519476	22512500	0.00333226	0.0829569	0.0290144	0.698682	0.000841834	0.15572
rs738801	22513198	0.0293622	0.134012	0.130227	0.0823091	0.016959	1.08455
rs2070464	22513875	0.0243254	0.141733	0.115693	0.122702	0.0133848	0.911149
rs9624335	22514328	0.0244402	0.478061	0.190348	0.0110993	0.0362323	1.95471
rs12159216	22514686	-0.00671449	0.106442	-0.0366236	0.631004	0.00134129	0.199968
rs12159218	22514696	-0.000757476	0.0118683	-0.00411281	0.957234	1.69152e-05	0.0189817
rs5751749	22514850	-0.00988502	0.157353	-0.0540042	0.499986	0.00291645	0.301042
rs5751751	22514915	-0.00738469	0.106135	-0.0387942	0.617196	0.00150499	0.209577
rs7284860	22515163	-0.013852	0.27532	-0.0827788	0.295064	0.00685232	0.530084
rs6003911	22515599	0.000927702	0.00740377	0.00493059	0.949348	2.43107e-05	0.0225748
rs11090292	22516016	-0.00461549	0.0695321	-0.0246837	0.744727	0.000609285	0.128003
rs12627810	22516431	0.00719816	0.0920899	0.0463985	0.559745	0.00215282	0.25201
rs6003913	22516623	-0.00431345	0.0592891	-0.0222866	0.766207	0.000496691	0.115654
rs6003914	22516637	-0.00513077	0.0697309	-0.0263995	0.726167	0.000696936	0.138964
rs5760065	22516723	-0.0530823	0.529336	-0.246146	0.00102347	0.0605877	2.98992
rs6003916	22516823	0.00382107	0.0297386	0.0201161	0.791918	0.000404657	0.10132
rs735750	22517123	0.035908	0.209218	0.170779	0.0226979	0.0291656	1.64401
rs762269	22517486	0.0500695	0.257211	0.211286	0.00481872	0.0446419	2.31707
rs5760066	22517820	0.0481249	0.235336	0.204723	0.00630768	0.0419114	2.20013
rs8138673	22519032	0.0142594	0.350999	0.123505	0.101323	0.0152534	0.994293
rs8140004	22520879	0.00357778	0.979761	0.100359	0.180585	0.0100719	0.743318
rs738802	22522081	-0.0160631	0.263524	-0.0888014	0.236113	0.00788568	0.62688
rs738803	22522879	-0.0326971	0.244541	-0.141087	0.0597899	0.0199056	1.22337
rs738804	22523103	-0.0242953	0.201528	-0.107193	0.150392	0.0114904	0.822776
rs5760071	22524941	0.0676343	0.319334	0.302546	5.42615e-05	0.0915342	4.26551
rs5760075	22528535	0.0748322	0.368405	0.338483	7.10619e-06	0.114571	5.14836
rs17004019	22530096	-0.000173478	0.0284174	-0.0027783	0.970934	7.71893e-06	0.0128103
rs5760076	22531562	-0.0427391	0.298495	-0.182249	0.0156146	0.0332146	1.80647
rs9620328	22533799	0.0634636	0.308325	0.286033	0.000124274	0.081815	3.90562
rs2275979	22534158	-0.0360837	0.261371	-0.154793	0.0378234	0.0239608	1.42224
rs4822441	22536355	-0.0304417	0.322537	-0.143816	0.0550172	0.020683	1.2595
rs2330625	22537962	-0.0304417	0.322537	-0.143816	0.0550172	0.020683	1.2595
rs6003933	22538246	-0.0339355	0.348259	-0.158736	0.0352153	0.0251972	1.45327
rs6003934	22538382	-0.0599505	0.551097	-0.271572	0.000953799	0.0737512	3.02054
rs2330626	22539759	-0.0880673	0.772216	-0.393948	1.47279e-07	0.155195	6.83186
rs4428104	22540050	0.12626	0.604676	0.539592	8.15681e-13	0.29116	12.0885
rs7292659	22540725	-0.00187136	0.962413	-0.0527852	0.478829	0.00278628	0.31982
rs1018743	22541980	-0.0861173	0.763602	-0.386348	2.17879e-07	0.149265	6.66178
rs11913427	22542826	0.00925813	0.158456	0.0678633	0.365249	0.00460543	0.437411
rs12157360	22547449	0.00925813	0.158456	0.0678633	0.365249	0.00460543	0.437411
rs1003784	22550358	-0.0794941	0.697042	-0.355598	2.09255e-06	0.12645	5.67933
rs4822442	22551295	-0.0794941	0.697042	-0.355598	2.09255e-06	0.12645	5.67933
rs9612496	22551405	0.125009	0.560786	0.545007	1.61671e-12	0.297032	11.7914
rs2236619	22552606	0.125931	0.598549	0.539188	6.30718e-13	0.290724	12.2002
rs2236620	22552710	0.125931	0.598549	0.539188	6.30718e-13	0.290724	12.2002
rs2236621	22552744	0.125931	0.598549	0.539188	6.30718e-13	0.290724	12.2002
rs9612498	22553667	0.12704	0.599401	0.544978	2.639e-13	0.297001	12.5786
rs9608213	22554655	0.11445	0.521877	0.496064	4.50558e-10	0.246079	9.34625
rs2070460	22556242	-0.0855563	0.763359	-0.38446	2.90769e-07	0.147809	6.53645
rs6003939	22557246	0.0110533	0.180679	0.0793654	0.300763	0.00629886	0.521775
rs1129067	22558125	-0.0926375	0.835827	-0.417521	2.12338e-08	0.174324	7.67297
rs8141314	22558937	0.132436	0.615811	0.570473	1.98175e-13	0.325439	12.703
rs1984309	22560815	-0.0920317	0.835798	-0.415521	2.9608e-08	0.172658	7.52859
rs9612503	22562875	0.153106	0.687335	0.676337	0	0.457431	25
rs915591	22563462	0.00366002	0.979761	0.101513	0.180557	0.0103048	0.743386
rs5760090	22563592	0.157061	0.76305	0.707882	0	0.501097	25
rs12628766	22563914	-0.0175735	0.602518	-0.133306	0.0959133	0.0177706	1.01812
rs875643	22563998	0.153106	0.687335	0.676337	0	0.457431	25
rs738806	22564172	-0.102736	0.856535	-0.453831	1.40536e-09	0.205963	8.85221
rs738807	22564245	-0.056203	0.802901	-0.294584	7.74171e-05	0.0867797	4.11116
rs5751759	22564493	-0.0595158	0.808863	-0.306229	4.85329e-05	0.093776	4.31396
rs2012124	22564664	-0.0986668	0.845715	-0.43882	7.1045e-09	0.192563	8.14847
rs2012133	22564734	-0.103186	0.855917	-0.455265	1.00876e-09	0.207266	8.99621
rs12485058	22564859	-0.0578908	0.790255	-0.29835	9.12216e-05	0.0890129	4.0399
rs12483884	22564935	-0.0107473	0.994894	-0.130283	0.0972693	0.0169738	1.01202
rs4822443	22565198	-0.056203	0.802901	-0.294584	7.74171e-05	0.0867797	4.11116
rs2096525	22566819	-0.0566954	0.814843	-0.29784	0.000124347	0.0887084	3.90537
rs2070767	22567463	-0.0739446	0.625986	-0.327858	3.36693e-05	0.107491	4.47277
rs2000466	22567862	-0.0569052	0.817576	-0.298903	7.32747e-05	0.0893429	4.13505
rs10433311	22568830	0.00149672	0.181909	0.0280691	0.724221	0.000787875	0.140129
rs1007889	22569243	-0.0471045	0.388309	-0.207525	0.0059028	0.0430667	2.22894
rs17004044	22569895	-0.00468515	0.100105	-0.0288605	0.705058	0.000832929	0.151775
rs5760091	22570017	-0.0887183	0.661254	-0.382568	2.8563e-07	0.146358	6.5442
rs17004046	22570304	-1.61594e-06	4.15527e-05	-1.07803e-05	0.999885	1.16216e-10	5.01205e-05
rs5760093	22570340	-0.100075	0.748462	-0.431822	8.35036e-09	0.186471	8.07829
rs17004047	22570919	-0.0116039	0.994615	-0.135529	0.0690156	0.0183682	1.16105
rs1007888	22571101	-0.105779	0.625538	-0.443799	3.19957e-09	0.196958	8.49491
rs2000467	22571533	-0.0952098	0.612924	-0.401772	8.30807e-08	0.161421	7.0805
rs17004049	22571594	-0.00189238	0.962413	-0.0530826	0.478815	0.00281776	0.319832
rs2000468	22571611	-0.10401	0.62231	-0.436568	5.72685e-09	0.190592	8.24208
rs11703791	22571984	-0.00187136	0.962413	-0.0527852	0.478829	0.00278628	0.31982
rs4822450	22572887	-0.10401	0.62231	-0.436568	5.72685e-09	0.190592	8.24208
rs4820571	22572973	-0.0952098	0.612924	-0.401772	8.30807e-08	0.161421	7.0805
rs5751760	22573573	-0.103459	0.618692	-0.434247	5.67582e-09	0.188571	8.24597
rs5751761	22573736	-0.103459	0.618692	-0.434247	5.67582e-09	0.188571	8.24597
rs2000469	22575292	-0.0893126	0.556754	-0.375807	1.11024e-06	0.141231	5.95458
rs12628303	22575915	0.0132936	0.995317	0.196461	0.0176038	0.038597	1.75439
rs11913559	22577073	-0.00989565	0.99522	-0.124877	0.0975833	0.0155943	1.01062
rs5760095	22577293	-0.101347	0.613599	-0.425636	1.35733e-08	0.181166	7.86732
rs5760096	22577310	-0.103527	0.923703	-0.465216	5.40916e-10	0.216426	9.26687
rs4822451	22578166	-0.0986528	0.604482	-0.414608	3.17394e-08	0.1719	7.4984
rs7285522	22578278	-0.00187136	0.962413	-0.0527852	0.478829	0.00278628	0.31982
rs5760098	22578314	-0.0952098	0.612924	-0.401772	8.30807e-08	0.161421	7.0805
rs7293178	22578370	-0.00189238	0.962413	-0.0530826	0.478815	0.00281776	0.319832
rs5760101	22578712	-0.104847	0.924967	-0.469751	4.60667e-10	0.220666	9.33661
rs5760102	22578761	-0.0907895	0.599648	-0.384201	2.96146e-07	0.147611	6.52849
rs5760103	22578781	-0.105648	0.926369	-0.47259	2.87938e-10	0.223341	9.5407
rs5760106	22580645	-0.0949004	0.610074	-0.40041	7.78402e-08	0.160328	7.1088
rs2330634	22580795	-0.101347	0.613599	-0.425636	1.35733e-08	0.181166	7.86732
rs2330635	22581344	-0.0935649	0.610057	-0.395362	1.3291e-07	0.156311	6.87644
rs2877178	22581517	-0.084972	0.520739	-0.357116	1.39594e-05	0.127532	4.85513
rs3884794	22581766	-0.0953523	0.794975	-0.421214	1.91295e-08	0.177421	7.7183
rs2154593	22582085	-0.0969908	0.601546	-0.40796	5.24309e-08	0.166431	7.28041
rs5751770	22582842	-0.0965721	0.598381	-0.40617	5.05546e-08	0.164974	7.29624
rs7292185	22583687	-0.00189238	0.962413	-0.0530826	0.478815	0.00281776	0.319832
rs2154594	22584055	-0.093296	0.607352	-0.394158	1.23534e-07	0.155361	6.90821
rs2186366	22584113	-0.0923317	0.602016	-0.390151	1.93718e-07	0.152218	6.71283
rs4822453	22584862	-0.0969908	0.601546	-0.40796	5.24309e-08	0.166431	7.28041
rs4822454	22585208	-0.0935649	0.610057	-0.395362	1.3291e-07	0.156311	6.87644
rs5996631	22586894	-0.122988	0.893549	-0.527877	1.88472e-12	0.278654	11.7248
rs1002286	22587337	-0.102286	0.61928	-0.429576	9.96882e-09	0.184536	8.00136
rs4461358	22590106	-0.126349	0.944962	-0.545192	3.49609e-13	0.297235	12.4564
rs8141882	22590642	-0.00978492	0.995267	-0.124159	0.0976227	0.0154155	1.01045
rs8138536	22590743	-0.00978492	0.995267	-0.124159	0.0976227	0.0154155	1.01045
rs915589	22591004	-0.118203	0.939294	-0.516436	5.57476e-12	0.266706	11.2538
rs6003952	22591108	-0.00635122	0.992	-0.0993657	0.203195	0.00987355	0.692087
rs6003955	22592112	-0.00770876	0.991127	-0.109643	0.141288	0.0120215	0.849896
rs6003959	22594395	-0.120303	0.941269	-0.523852	2.76745e-12	0.274421	11.5579
rs4822458	22595659	-0.103088	0.616794	-0.432699	7.79097e-09	0.187228	8.10841
rs5751777	22597047	-0.0952098	0.612924	-0.401772	8.30807e-08	0.161421	7.0805
rs4822461	22598120	0.0112049	0.161496	0.0760785	0.3101	0.00578793	0.508499
rs6003962	22598857	0.0112049	0.161496	0.0760785	0.3101	0.00578793	0.508499
rs1892714	22599358	0.0112049	0.161496	0.0760785	0.3101	0.00578793	0.508499
rs1892715	22599430	0.0112049	0.161496	0.0760785	0.3101	0.00578793	0.508499
rs2330638	22600033	0.0112049	0.161496	0.0760785	0.3101	0.00578793	0.508499
rs5996633	22600585	0.0112049	0.161496	0.0760785	0.3101	0.00578793	0.508499
rs5996634	22600732	0.0112049	0.161496	0.0760785	0.3101	0.00578793	0.508499
rs6003970	22600733	0.0112049	0.161496	0.0760785	0.3101	0.00578793	0.508499
rs5996635	22600777	0.0112049	0.161496	0.0760785	0.3101	0.00578793	0.508499
GSTT2B_L	22604043
rs575959	22619365	-0.10401	0.62231	-0.436568	5.72685e-09	0.190592	8.24208
rs113413	22622264	0.202166	0.945194	0.869452	0	0.755947	25
rs413409	22623257	0.0632269	0.632269	0.367403	4.45659e-06	0.134985	5.351
GSTT2B_R	22641297
rs9624364	22641474	-0.0141661	0.994516	-0.150313	0.0486856	0.022594	1.3126
rs4822466	22642204	-0.10401	0.62231	-0.436568	5.72685e-09	0.190592	8.24208
rs1006771	22644006	-0.0793516	0.562007	-0.33912	6.82932e-06	0.115003	5.16562
rs140188	22654052	0.117408	0.656161	0.492434	5.03504e-11	0.242492	10.298
rs140245	22659711	0.164483	0.900863	0.767293	0	0.588739	25
rs12158716	22660265	0.0126052	0.995483	0.191218	0.0176465	0.0365643	1.75334
rs140277	22663547	0.165537	0.896446	0.769567	0	0.592234	25
rs5760147	22664948	0.207256	0.915423	0.912035	0	0.831808	25
rs140288	22665977	0.00200004	0.267698	0.0393386	0.603822	0.00154753	0.219091
rs140289	22666327	-0.102545	0.643849	-0.431735	8.40796e-09	0.186395	8.07531
rs6004011	22668071	-0.0174592	0.997668	-0.167953	0.0242391	0.028208	1.61548
rs402635	22668636	-0.0757759	0.999242	-0.38563	2.29418e-07	0.14871	6.63937
rs8141342	22668686	-0.0174592	0.997668	-0.167953	0.0242391	0.028208	1.61548
rs6004014	22669438	-0.0174592	0.997668	-0.167953	0.0242391	0.028208	1.61548
rs5996651	22670108	-0.017622	0.99578	-0.168624	0.0244666	0.028434	1.61143
rs7291786	22670544	-0.00594945	0.302572	-0.0541691	0.469861	0.00293429	0.328031
GSTT1_L	22673051
rs140294	22674335	-0.118361	0.802601	-0.502562	2.01395e-11	0.252568	10.696
rs407257	22676550	0.226066	0.999746	0.991165	0	0.982408	25
rs428792	22699690	0.043518	0.998175	0.364737	2.99862e-06	0.133033	5.52308
rs6004035	22715247	-0.0535972	0.998705	-0.311872	0.000133647	0.0972643	3.87404
GSTT1_R	22727805
rs9608229	22729364	0.114508	0.825777	0.586029	7.10654e-13	0.343431	12.1483
rs8138555	22730360	-0.017622	0.99578	-0.168624	0.0244666	0.028434	1.61143
rs17004810	22732320	0.190632	0.896423	0.818521	0	0.669977	25
rs5760176	22732321	0.163249	0.894104	0.761536	0	0.579938	25
rs405597	22734578	0.0537436	0.545091	0.314113	2.77991e-05	0.0986667	4.55597
rs17004811	22734830	-0.116257	0.892377	-0.504224	1.33418e-11	0.254242	10.8748
rs738809	22735492	-0.117788	0.89408	-0.509718	1.04269e-11	0.259812	10.9818
rs422674	22736778	-0.0150567	0.150145	-0.0698189	0.351595	0.00487467	0.453957
rs9624386	22737334	0.0138014	0.601599	0.156813	0.0408945	0.0245905	1.38833
rs11090305	22737483	0.0171816	0.0929582	0.0721588	0.335689	0.00520689	0.474063
rs5760180	22744829	0.0171816	0.0929582	0.0721588	0.335689	0.00520689	0.474063
rs6004041	22749426	0.0130025	0.074797	0.0615886	0.419248	0.00379315	0.377529
rs9624387	22750128	0.00259208	0.0244769	0.0147159	0.844349	0.000216556	0.0734781
rs6004045	22753790	-0.00128123	0.02172	-0.00717574	0.92373	5.14912e-05	0.034455
rs4822469	22755114	0.0171816	0.0929582	0.0721588	0.335689	0.00520689	0.474063
rs2267050	22755412	0.00209886	0.0179614	0.0114594	0.878487	0.000131318	0.0562647
rs2267051	22757825	0.00306041	0.0276221	0.0170634	0.820913	0.000291158	0.0857029
rs873833	22757878	0.0177048	0.0957308	0.0743587	0.323898	0.00552921	0.489592
rs5996663	22759241	0.0171816	0.0929582	0.0721588	0.335689	0.00520689	0.474063
rs5760182	22761450	0.00366002	0.979761	0.101513	0.180557	0.0103048	0.743386
rs2070465	22763140	0.00032024	0.00282892	0.00177038	0.981156	3.13423e-06	0.00826194
rs2282475	22768047	0.0116077	0.0627638	0.0487516	0.517785	0.00237672	0.28585
rs5760189	22772459	0.0303829	0.189096	0.147666	0.0488263	0.0218051	1.31135
rs12485146	22773697	0.0088754	0.0895732	0.0517683	0.507358	0.00267995	0.294685
rs2070466	22776200	0.00209886	0.0179614	0.0114594	0.878487	0.000131318	0.0562647
rs5760190	22777089	-0.00130208	0.223214	-0.0213242	0.774806	0.000454723	0.110807
rs17004824	22778398	-1.97478e-06	3.38534e-05	-1.11095e-05	0.999881	1.23421e-10	5.16841e-05
rs2073396	22781035	0.0230921	0.158092	0.115991	0.12174	0.0134539	0.914567
rs2070467	22782885	0.0133191	0.0705597	0.0560225	0.454802	0.00313852	0.342178
rs9624393	22786538	0.0075921	0.992814	0.147622	0.0542602	0.0217922	1.26552
rs2282476	22793564	-0.0208278	0.23027	-0.0997488	0.18325	0.00994982	0.736956
rs6004052	22793748	-0.00243516	0.0437335	-0.0139585	0.853087	0.000194841	0.0690066
rs3788367	22793996	0.00209886	0.0179614	0.0114594	0.878487	0.000131318	0.0562647
rs3827321	22794377	-0.00128123	0.02172	-0.00717574	0.92373	5.14912e-05	0.034455
rs2267055	22794595	0.00733467	0.993001	0.145082	0.0542634	0.0210487	1.26549
rs2051198	22795672	0.0116077	0.0627638	0.0487516	0.517785	0.00237672	0.28585
rs5996665	22799115	-1.97478e-06	3.38534e-05	-1.11095e-05	0.999881	1.23421e-10	5.16841e-05
rs2283807	22802270	0.0162037	0.0867447	0.0680993	0.363583	0.00463752	0.439396
rs17004830	22803420	0.00381592	0.0364385	0.0217617	0.770314	0.000473574	0.113332
rs2000470	22818861	0.0162037	0.0867447	0.0680993	0.363583	0.00463752	0.439396
rs5751803	22819649	0.0156273	0.0837175	0.0656734	0.378263	0.004313	0.422206
rs2236622	22822061	0.0162037	0.0867447	0.0680993	0.363583	0.00463752	0.439396
rs4820582	22827624	0.00833185	0.0445716	0.0350181	0.642241	0.00122627	0.192302
rs2070468	22828665	0.000892104	0.00394031	0.00392572	0.958229	1.54113e-05	0.0185306
rs17004835	22829356	0.00361843	0.979761	0.100931	0.180571	0.010187	0.743351
rs176156	22830866	0.0162037	0.0867447	0.0680993	0.363583	0.00463752	0.439396
rs176157	22833987	0.0177355	0.269822	0.123332	0.0998759	0.0152108	1.00054
rs112272	22840620	0.0162037	0.0867447	0.0680993	0.363583	0.00463752	0.439396
rs12169286	22843946	-0.00477972	0.0394019	-0.0210577	0.779967	0.000443426	0.107924
rs176159	22844352	0.0204843	0.29524	0.139084	0.0635095	0.0193443	1.19716
rs2267057	22844600	0.000892104	0.00394031	0.00392572	0.958229	1.54113e-05	0.0185306
rs176160	22844910	0.007682	0.992751	0.148499	0.0542583	0.022052	1.26553
rs13057912	22845227	-0.00392417	0.986649	-0.0776212	0.303122	0.00602505	0.518383
rs176161	22846291	0.0204843	0.29524	0.139084	0.0635095	0.0193443	1.19716
rs6004064	22848728	-0.000782517	0.00638789	-0.00343963	0.963193	1.18311e-05	0.0162868
rs2070471	22850375	-0.00728307	0.056984	-0.0317138	0.672212	0.00100576	0.172494
rs2267059	22855711	0.0162037	0.0867447	0.0680993	0.363583	0.00463752	0.439396
rs8139439	22862142	0.000892104	0.00394031	0.00392572	0.958229	1.54113e-05	0.0185306
rs9608243	22862247	-0.00191389	0.962413	-0.053385	0.478801	0.00284996	0.319845
rs2001106	22865229	0.0177355	0.269822	0.123332	0.0998759	0.0152108	1.00054
rs9612557	22865630	-0.00579028	0.99262	-0.0948275	0.203286	0.00899225	0.691892
rs2267060	22865962	0.0162037	0.0867447	0.0680993	0.363583	0.00463752	0.439396
rs2283808	22868040	0.000892104	0.00394031	0.00392572	0.958229	1.54113e-05	0.0185306
rs17004848	22868918	0.0182795	0.281223	0.127747	0.0865453	0.0163194	1.06276
rs13057834	22869092	-0.00585488	0.992542	-0.0953604	0.203279	0.0090936	0.691909
rs5760216	22869734	0.0139599	0.224874	0.0995803	0.183991	0.00991625	0.735204
rs2267061	22870281	0.00259208	0.0244769	0.0147159	0.844349	0.000216556	0.0734781
rs5760220	22872480	0.0236254	0.475304	0.186387	0.0150909	0.0347402	1.82129
rs2267062	22874482	0.0162037	0.0867447	0.0680993	0.363583	0.00463752	0.439396
rs2267063	22874607	0.0162037	0.0867447	0.0680993	0.363583	0.00463752	0.439396
rs2267064	22874632	0.0162037	0.0867447	0.0680993	0.363583	0.00463752	0.439396
rs2267065	22875060	0.000892104	0.00394031	0.00392572	0.958229	1.54113e-05	0.0185306
rs2267066	22876298	0.0162037	0.0867447	0.0680993	0.363583	0.00463752	0.439396
rs2267067	22877071	0.000892104	0.00394031	0.00392572	0.958229	1.54113e-05	0.0185306
rs5760222	22877685	-0.00130208	0.223214	-0.0213242	0.774806	0.000454723	0.110807
rs2267068	22880303	0.0162037	0.0867447	0.0680993	0.363583	0.00463752	0.439396
rs879756	22882872	0.0133191	0.0705597	0.0560225	0.454802	0.00313852	0.342178
rs8140812	22883535	0.0177355	0.269822	0.123332	0.0998759	0.0152108	1.00054
rs2267069	22884166	0.00032024	0.00282892	0.00177038	0.981156	3.13423e-06	0.00826194
rs6519501	22886507	0.0162037	0.0867447	0.0680993	0.363583	0.00463752	0.439396
rs2267070	22888318	0.0162037	0.0867447	0.0680993	0.363583	0.00463752	0.439396
rs2267071	22889739	0.00654632	0.0293883	0.028918	0.699634	0.000836252	0.155129
rs5760229	22890254	0.0177355	0.269822	0.123332	0.0998759	0.0152108	1.00054
rs5760233	22894648	0.0177355	0.269822	0.123332	0.0998759	0.0152108	1.00054
rs8136015	22896894	-0.00134976	0.0112533	-0.00596251	0.936595	3.55515e-05	0.028448
rs8137732	22897031	0.0162037	0.0867447	0.0680993	0.363583	0.00463752	0.439396
rs2267072	22900812	-0.00385877	0.98123	-0.0767551	0.305816	0.00589134	0.514539
rs8137222	22906159	0.0120965	0.0634219	0.0509284	0.49684	0.0025937	0.303783
rs3788368	22907986	0.011951	0.155845	0.0776739	0.300062	0.00603324	0.522788
rs1985494	22910694	0.0165267	0.150801	0.0925461	0.224851	0.00856477	0.648106
rs3752497	22911207	0.0287531	0.99846	0.292964	0.000230959	0.0858278	3.63646
rs8141797	22912041	0.0177355	0.269822	0.123332	0.0998759	0.0152108	1.00054
rs2070469	22912739	-0.00566991	0.0478025	-0.0251142	0.73616	0.000630724	0.133028
rs5760244	22914970	0.0151013	0.0800009	0.0635186	0.396748	0.00403461	0.401485
rs9624412	22915313	0.0144464	0.0765935	0.0607598	0.41497	0.00369175	0.381983
rs5751813	22916071	0.0151013	0.0800009	0.0635186	0.396748	0.00403461	0.401485
rs9608247	22917303	-0.00579028	0.99262	-0.0948275	0.203286	0.00899225	0.691892
rs8138769	22921879	0.0263518	0.135216	0.111217	0.140089	0.0123692	0.853597
rs4521150	22930438	0.0215648	0.109686	0.0911214	0.246136	0.00830311	0.608825
rs8141627	22935185	0.0271614	0.138135	0.114772	0.125709	0.0131725	0.900634
rs5996674	22938329	0.0263178	0.126269	0.112424	0.133634	0.0126392	0.874084
rs6004094	22938924	0.000484664	0.00497091	0.00284574	0.969545	8.09822e-06	0.0134323
rs5760263	22941330	0.0340039	0.158979	0.146239	0.0497615	0.021386	1.30311
rs743359	22941717	0.0263178	0.126269	0.112424	0.133634	0.0126392	0.874084
rs738810	22945506	0.00296271	0.0312049	0.0175877	0.814481	0.000309329	0.0891193
rs8140505	22946876	-0.00270966	0.0475191	-0.0153834	0.837385	0.000236648	0.0770748
rs5996675	22948331	0.0215055	0.125302	0.102281	0.172381	0.0104613	0.763511
rs2275984	22952648	0.000197632	0.00112752	0.000933674	0.990061	8.71747e-07	0.00433796
rs2275985	22960093	0.0282308	0.177676	0.137724	0.064637	0.0189679	1.18952
rs4822473	22961791	0.0325672	0.217522	0.162165	0.0304984	0.0262976	1.51572
rs4443101	22962403	0.0325672	0.217522	0.162165	0.0304984	0.0262976	1.51572
rs2267073	22969069	-0.0454299	0.271816	-0.190687	0.0109567	0.0363614	1.96032
rs2078191	22971203	0.00504306	0.0276204	0.0235252	0.753624	0.000553435	0.122846
rs5760275	22973449	0.0394045	0.250948	0.193007	0.0100228	0.0372519	1.99901
rs5760276	22973609	0.0210628	0.306988	0.143717	0.0538346	0.0206545	1.26894
rs2276449	22974636	0.0423019	0.289606	0.212481	0.00458474	0.0451481	2.33869
rs16999793	22986875	0.0205685	0.293122	0.138963	0.065249	0.0193106	1.18543
rs5760289	22988457	0.0240172	0.332546	0.160225	0.0315838	0.0256719	1.50054
rs5760293	22992171	0.0234125	0.320571	0.155429	0.0381085	0.0241583	1.41898
rs5760294	22992649	0.0240172	0.332546	0.160225	0.0315838	0.0256719	1.50054
rs5760301	22999465	-0.0317669	0.264848	-0.140329	0.0611766	0.0196921	1.21341
rs4822482	23000719	-0.0384629	0.337261	-0.172055	0.0217047	0.0296029	1.66345
rs5760304	23005337	-0.0110124	0.155572	-0.0574797	0.443156	0.00330391	0.353443
rs4822483	23007025	-0.0317669	0.264848	-0.140329	0.0611766	0.0196921	1.21341
rs5751837	23011371	0.0189251	0.312993	0.136601	0.0732118	0.0186599	1.13542
rs9624447	23011555	0.0133461	0.0602287	0.05903	0.433556	0.00348454	0.362955
rs5751838	23011579	-0.0317669	0.264848	-0.140329	0.0611766	0.0196921	1.21341
rs5996687	23015076	-0.00189238	0.962413	-0.0530826	0.478815	0.00281776	0.319832
rs5760317	23021208	0.0234125	0.320571	0.155429	0.0381085	0.0241583	1.41898
rs5751841	23025769	0.0234125	0.320571	0.155429	0.0381085	0.0241583	1.41898
rs5760326	23027313	0.0240172	0.332546	0.160225	0.0315838	0.0256719	1.50054
rs1041748	23030854	0.0117006	0.0525274	0.0516869	0.490453	0.00267153	0.309403
rs5760327	23031862	0.0240996	0.326272	0.159204	0.0346793	0.025346	1.45993
rs5751842	23032874	0.00977421	0.16165	0.07055	0.354833	0.00497731	0.449976
rs4822484	23034556	-0.0110124	0.155572	-0.0574797	0.443156	0.00330391	0.353443
rs5751843	23036160	-0.0140729	0.418167	-0.100084	0.211284	0.0100167	0.675134
rs2000472	23036298	-0.00195333	0.0122643	-0.00822387	0.912631	6.7632e-05	0.0397046
rs7289477	23037006	0.0259694	0.355581	0.172404	0.0214393	0.0297231	1.66879
rs5760331	23037112	-0.0110124	0.155572	-0.0574797	0.443156	0.00330391	0.353443
rs5760332	23038563	0.0234125	0.320571	0.155429	0.0381085	0.0241583	1.41898
rs12106584	23041374	0.0234125	0.320571	0.155429	0.0381085	0.0241583	1.41898
rs5751846	23045049	-0.0151293	0.160298	-0.0714751	0.340288	0.00510869	0.468153
rs9624456	23046720	0.0234125	0.320571	0.155429	0.0381085	0.0241583	1.41898
rs3747113	23047518	0.0108112	0.0487892	0.0478181	0.525833	0.00228658	0.279152
rs718126	23049085	-0.00195333	0.0122643	-0.00822387	0.912631	6.7632e-05	0.0397046
rs2298378	23049605	0.0145937	0.0662514	0.0646412	0.385804	0.00417848	0.413634
rs5760341	23051549	0.0230904	0.317844	0.153647	0.0451433	0.0236075	1.34541
rs5760342	23051578	0.0234125	0.320571	0.155429	0.0381085	0.0241583	1.41898
rs5760345	23053644	0.0367851	0.354318	0.210517	0.0115303	0.0443173	1.93816
rs5760346	23054724	0.0210887	0.333094	0.149117	0.0642424	0.0222359	1.19218
rs5751847	23055335	0.0234125	0.320571	0.155429	0.0381085	0.0241583	1.41898
rs2298379	23055805	0.0234125	0.320571	0.155429	0.0381085	0.0241583	1.41898
rs2298380	23056718	-0.0317669	0.264848	-0.140329	0.0611766	0.0196921	1.21341
rs2298381	23056752	-0.0137297	0.190837	-0.0712317	0.339237	0.00507395	0.469496
rs5760347	23057410	0.014385	0.302454	0.115811	0.138046	0.0134122	0.859976
rs5760351	23060587	-0.0317669	0.264848	-0.140329	0.0611766	0.0196921	1.21341
rs5760352	23061070	0.0234125	0.320571	0.155429	0.0381085	0.0241583	1.41898
rs4822485	23062045	-0.0219083	0.314763	-0.115076	0.126845	0.0132426	0.896725
rs5751849	23062460	0.0107903	0.996026	0.176712	0.0177473	0.0312273	1.75087
rs8135108	23063560	0.00357778	0.979761	0.100359	0.180585	0.0100719	0.743318
rs5751850	23067327	0.0240172	0.332546	0.160225	0.0315838	0.0256719	1.50054
rs5760354	23067974	0.0148599	0.30863	0.118961	0.129993	0.0141518	0.886079
rs11090319	23072294	-0.0317669	0.264848	-0.140329	0.0611766	0.0196921	1.21341
rs11090320	23072426	-0.0137297	0.190837	-0.0712317	0.339237	0.00507395	0.469496
rs7293001	23072493	0.0216805	0.31248	0.147205	0.0495345	0.0216693	1.30509
rs11912242	23072850	0.0247029	0.33824	0.163996	0.0286708	0.0268948	1.54256
rs11912244	23072870	0.010031	0.165347	0.0722957	0.375921	0.00522667	0.424904
rs2082733	23075498	-0.0151293	0.160298	-0.0714751	0.340288	0.00510869	0.468153
rs2099443	23075667	-0.0155873	0.119263	-0.0675605	0.395757	0.00456442	0.402571
rs2015686	23077989	0.0213577	0.287075	0.140649	0.0699658	0.0197821	1.15511
rs5760357	23078527	0.0234459	0.313815	0.154117	0.0420583	0.023752	1.37615
rs5760358	23080273	-0.0110124	0.155572	-0.0574797	0.443156	0.00330391	0.353443
rs4822487	23080512	-0.0317669	0.264848	-0.140329	0.0611766	0.0196921	1.21341
rs5760359	23082835	0.0247029	0.33824	0.163996	0.0286708	0.0268948	1.54256
rs5760361	23084634	0.0087948	0.140378	0.0624795	0.420824	0.00390369	0.375899
rs5760362	23084791	0.0247029	0.33824	0.163996	0.0286708	0.0268948	1.54256
rs5760363	23084911	0.0240172	0.332546	0.160225	0.0315838	0.0256719	1.50054
rs5760364	23085025	0.0198827	0.286568	0.134998	0.0716863	0.0182246	1.14456
rs9608277	23086865	-0.0137297	0.190837	-0.0712317	0.339237	0.00507395	0.469496
rs17004905	23088832	-0.0179657	0.298049	-0.099759	0.180763	0.00995186	0.742889
rs8137515	23090101	0.0234125	0.320571	0.155429	0.0381085	0.0241583	1.41898
rs8137517	23090102	0.0234125	0.320571	0.155429	0.0381085	0.0241583	1.41898
rs5760367	23091853	0.0234125	0.320571	0.155429	0.0381085	0.0241583	1.41898
rs2196263	23096986	-0.0317669	0.264848	-0.140329	0.0611766	0.0196921	1.21341
rs11703914	23097602	0.0117006	0.0525274	0.0516869	0.490453	0.00267153	0.309403
rs5751856	23104907	-0.00195333	0.0122643	-0.00822387	0.912631	6.7632e-05	0.0397046
rs5760381	23104955	0.0240172	0.332546	0.160225	0.0315838	0.0256719	1.50054
rs5760382	23105644	-0.00195333	0.0122643	-0.00822387	0.912631	6.7632e-05	0.0397046
rs12163470	23105940	0.0240172	0.332546	0.160225	0.0315838	0.0256719	1.50054
rs5760387	23111680	-0.0317669	0.264848	-0.140329	0.0611766	0.0196921	1.21341
rs3890551	23116798	-0.0110124	0.155572	-0.0574797	0.443156	0.00330391	0.353443
rs5751858	23120533	0.0234125	0.320571	0.155429	0.0381085	0.0241583	1.41898
rs5760392	23123612	0.0227585	0.308115	0.150344	0.0460925	0.0226035	1.33637
rs1347387	23123716	-0.00264913	0.0391804	-0.0140683	0.851945	0.000197917	0.0695883
rs17004913	23123892	0.0280006	0.403572	0.190117	0.0111972	0.0361447	1.95089
rs4820586	23126290	-0.0317669	0.264848	-0.140329	0.0611766	0.0196921	1.21341
rs5751861	23130272	0.0234125	0.320571	0.155429	0.0381085	0.0241583	1.41898
rs5751862	23132564	-0.00195333	0.0122643	-0.00822387	0.912631	6.7632e-05	0.0397046
rs9608282	23134081	-0.00530039	0.266534	-0.0480039	0.524227	0.00230437	0.280481
rs1003774	23136804	-0.0317669	0.264848	-0.140329	0.0611766	0.0196921	1.21341
rs4822488	23137343	-0.0131492	0.200369	-0.0706313	0.37163	0.00498879	0.429889
rs743363	23138435	-0.00195333	0.0122643	-0.00822387	0.912631	6.7632e-05	0.0397046
rs5760401	23138993	-0.0317669	0.264848	-0.140329	0.0611766	0.0196921	1.21341
rs5760403	23139372	0.0240172	0.332546	0.160225	0.0315838	0.0256719	1.50054
rs3747114	23141667	-0.0317669	0.264848	-0.140329	0.0611766	0.0196921	1.21341
rs3747115	23142377	-0.021752	0.187499	-0.0968789	0.196175	0.00938553	0.707356
rs7678	23143165	0.0234125	0.320571	0.155429	0.0381085	0.0241583	1.41898
rs1057685	23143574	0.0234125	0.320571	0.155429	0.0381085	0.0241583	1.41898
rs5760410	23145406	-0.0314502	0.263583	-0.139104	0.064975	0.0193501	1.18725
rs12484115	23152446	-0.00388193	0.987119	-0.0772157	0.302923	0.00596226	0.518668
rs2298382	23155148	0.0234125	0.320571	0.155429	0.0381085	0.0241583	1.41898
rs2298383	23155511	0.00629498	0.0323379	0.0265639	0.723034	0.000705643	0.140841
rs3761422	23156672	-0.021752	0.187499	-0.0968789	0.196175	0.00938553	0.707356
rs3761423	23156863	0.0234125	0.320571	0.155429	0.0381085	0.0241583	1.41898
rs4530	23159521	-0.00189238	0.962413	-0.0530826	0.478815	0.00281776	0.319832
rs5751873	23160084	0.0221509	0.545253	0.191856	0.0152324	0.0368087	1.81723
rs2267076	23160595	-0.021752	0.187499	-0.0968789	0.196175	0.00938553	0.707356
rs11704811	23163164	-0.0127614	0.90632	-0.13616	0.0724825	0.0185396	1.13977
rs8184997	23163732	0.0240172	0.332546	0.160225	0.0315838	0.0256719	1.50054
rs4822489	23163760	0.00576332	0.0296399	0.024317	0.744238	0.000591315	0.128288
rs2236624	23166024	-0.0114477	0.126564	-0.0548253	0.464498	0.00300581	0.333016
rs2236625	23166222	0.0234125	0.320571	0.155429	0.0381085	0.0241583	1.41898
rs4990	23167117	-0.00200503	0.962413	-0.0546488	0.478741	0.00298649	0.319899
rs5760423	23170118	0.00853783	0.0430479	0.0361228	0.627933	0.00130486	0.202087
rs9612623	23170734	0.00923542	0.0465037	0.0390823	0.602072	0.00152743	0.220351
rs5751878	23171990	0.0240172	0.332546	0.160225	0.0315838	0.0256719	1.50054
rs5760425	23172452	0.00923542	0.0465037	0.0390823	0.602072	0.00152743	0.220351
rs5760428	23172857	0.0107903	0.996026	0.176712	0.0177473	0.0312273	1.75087
rs4822492	23173594	0.00629498	0.0323379	0.0265639	0.723034	0.000705643	0.140841
rs11703436	23173731	0.00385219	0.0196151	0.0162748	0.827157	0.000264868	0.0824119
rs1041749	23176391	0.00629498	0.0323379	0.0265639	0.723034	0.000705643	0.140841
rs1041750	23177606	0.00802756	0.0401378	0.0340095	0.672991	0.00115665	0.171991
rs5751879	23178425	0.0113032	0.196254	0.0833919	0.294538	0.0069542	0.530859
rs2186376	23178460	0.00629498	0.0323379	0.0265639	0.723034	0.000705643	0.140841
rs738816	23182233	0.00629498	0.0323379	0.0265639	0.723034	0.000705643	0.140841
rs1008932	23185182	-0.0231329	0.198282	-0.102883	0.167486	0.010585	0.77602
rs1008931	23185541	0.00629498	0.0323379	0.0265639	0.723034	0.000705643	0.140841
rs9612627	23186329	0.00629498	0.0323379	0.0265639	0.723034	0.000705643	0.140841
rs11704465	23192597	0.0151094	0.0768102	0.0689553	0.395249	0.00475483	0.40313
rs738813	23192738	-0.0231329	0.198282	-0.102883	0.167486	0.010585	0.77602
rs5760440	23195187	-0.021752	0.187499	-0.0968789	0.196175	0.00938553	0.707356
rs3966269	23197882	0.00629498	0.0323379	0.0265639	0.723034	0.000705643	0.140841
rs2032115	23199659	-0.021752	0.187499	-0.0968789	0.196175	0.00938553	0.707356
rs4822493	23200064	-0.021752	0.187499	-0.0968789	0.196175	0.00938553	0.707356
rs4822494	23200126	-0.021752	0.187499	-0.0968789	0.196175	0.00938553	0.707356
rs17842490	23200527	-0.00189238	0.962413	-0.0530826	0.478815	0.00281776	0.319832
rs5760441	23201831	-0.0231329	0.198282	-0.102883	0.167486	0.010585	0.77602
rs4820590	23204697	0.00629498	0.0323379	0.0265639	0.723034	0.000705643	0.140841
rs9620391	23205123	-0.0221651	0.187876	-0.0983065	0.189665	0.00966416	0.722013
rs4822498	23206800	-0.0231329	0.198282	-0.102883	0.167486	0.010585	0.77602
rs4822499	23206846	-0.0231329	0.198282	-0.102883	0.167486	0.010585	0.77602
rs5760444	23208218	-0.0231329	0.198282	-0.102883	0.167486	0.010585	0.77602
rs1547358	23208430	-0.021752	0.187499	-0.0968789	0.196175	0.00938553	0.707356
rs5760446	23208804	-0.0231329	0.198282	-0.102883	0.167486	0.010585	0.77602
rs5760447	23209289	-0.0222474	0.195232	-0.099539	0.191742	0.00990802	0.717282
rs1972487	23209656	-0.0180512	0.156566	-0.0805226	0.29377	0.00648389	0.531992
rs4822500	23211233	-0.021752	0.187499	-0.0968789	0.196175	0.00938553	0.707356
rs4822501	23211685	-0.021752	0.187499	-0.0968789	0.196175	0.00938553	0.707356
rs4822502	23211781	-0.021752	0.187499	-0.0968789	0.196175	0.00938553	0.707356
rs5760450	23213528	-0.0231329	0.198282	-0.102883	0.167486	0.010585	0.77602
rs5760452	23215223	-0.021752	0.187499	-0.0968789	0.196175	0.00938553	0.707356
rs2070473	23220894	0.0289987	0.378151	0.188472	0.0119189	0.0355218	1.92376
rs2070474	23221292	0.0186615	0.093046	0.0790986	0.291285	0.00625658	0.535682
rs2070475	23221355	0.00211234	0.0153936	0.010852	0.884241	0.000117766	0.0534292
rs3788369	23222973	0.0289987	0.378151	0.188472	0.0119189	0.0355218	1.92376
rs3788371	23223336	0.0289987	0.378151	0.188472	0.0119189	0.0355218	1.92376
rs5760455	23224017	0.0289987	0.378151	0.188472	0.0119189	0.0355218	1.92376
rs3788372	23224856	0.0122892	0.0612738	0.052089	0.487084	0.00271326	0.312396
rs762279	23227743	0.0122892	0.0612738	0.052089	0.487084	0.00271326	0.312396
